# Supplementary material
Source: PubMed Central journal article supplement (PMC5466893)

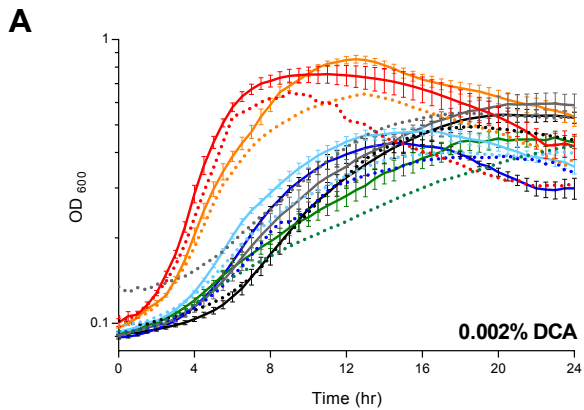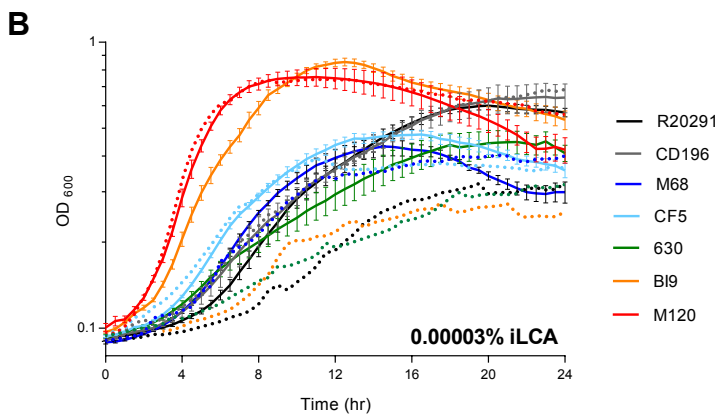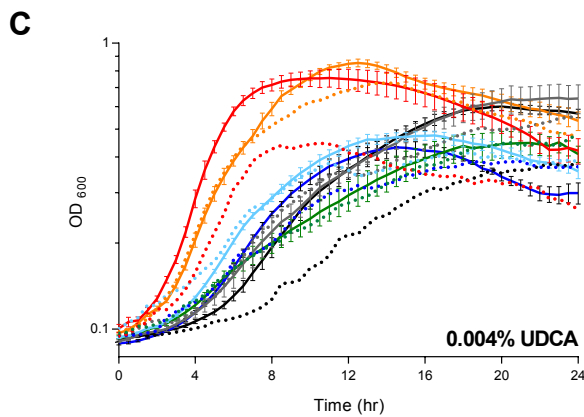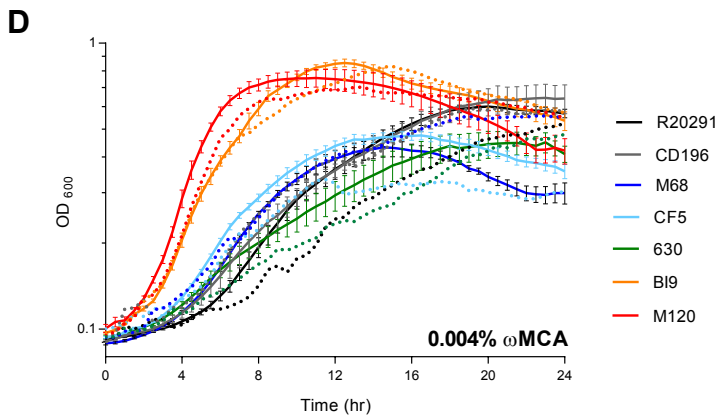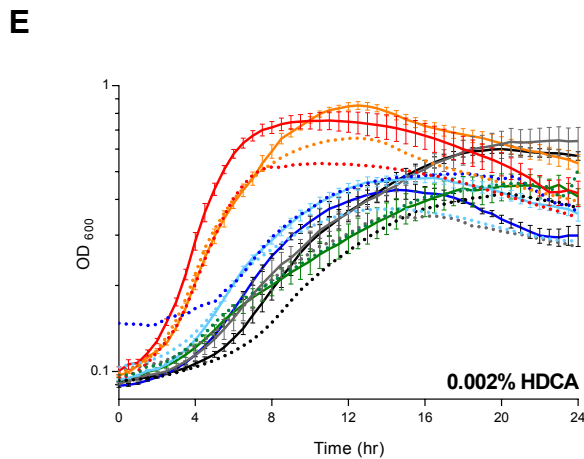

Supplement: NIHMS861079-supplement-2.pdf [file NIHMS861079-supplement-2.pdf]
